# Supplementary material
Source: MDPI journal article supplement (https://www.mdpi.com/2072-4292/13/14/2824)
Supplement: s1 [file s1]

## Supplementary Materials

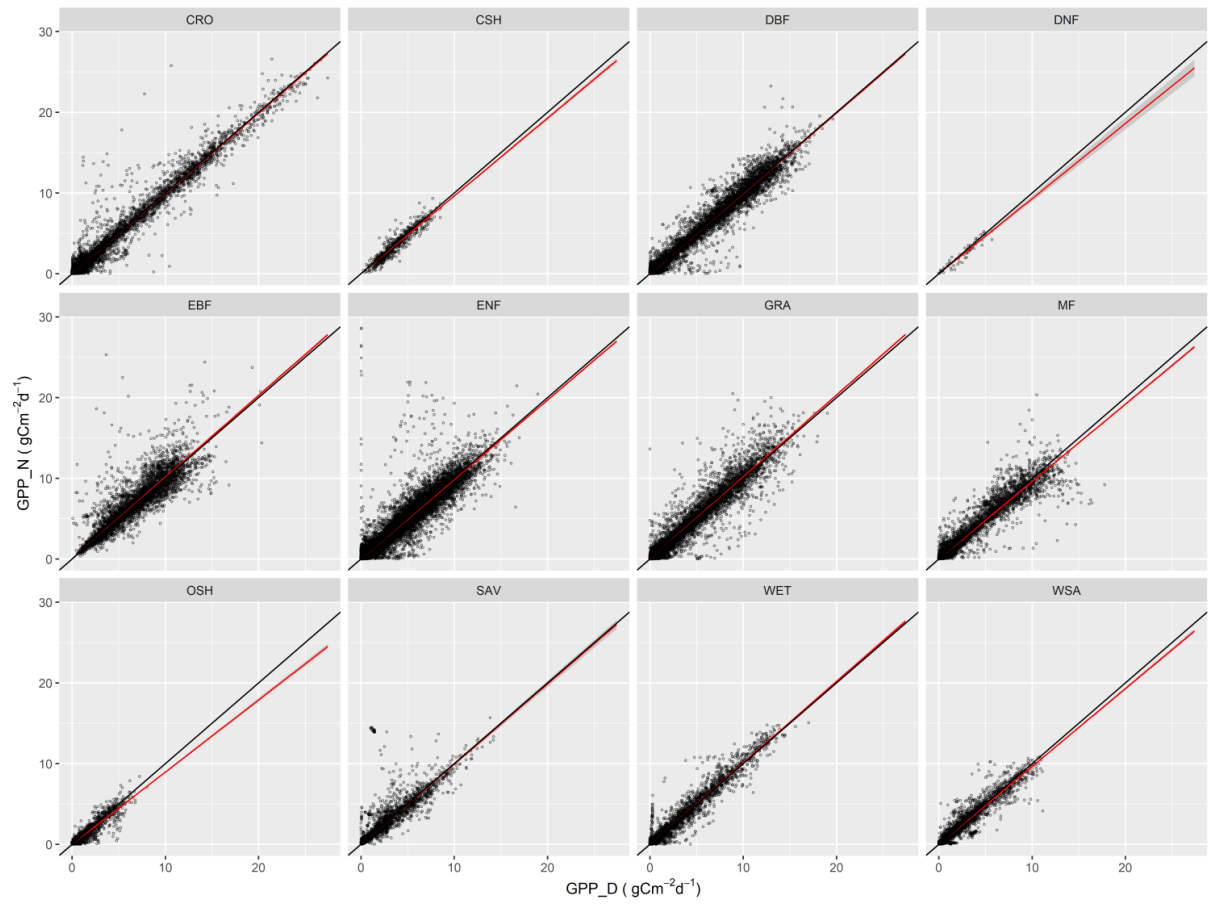

**Figure S1** There are significant difference between GPP\_N and GPP\_D across all 12 biomes except EBF and WET.

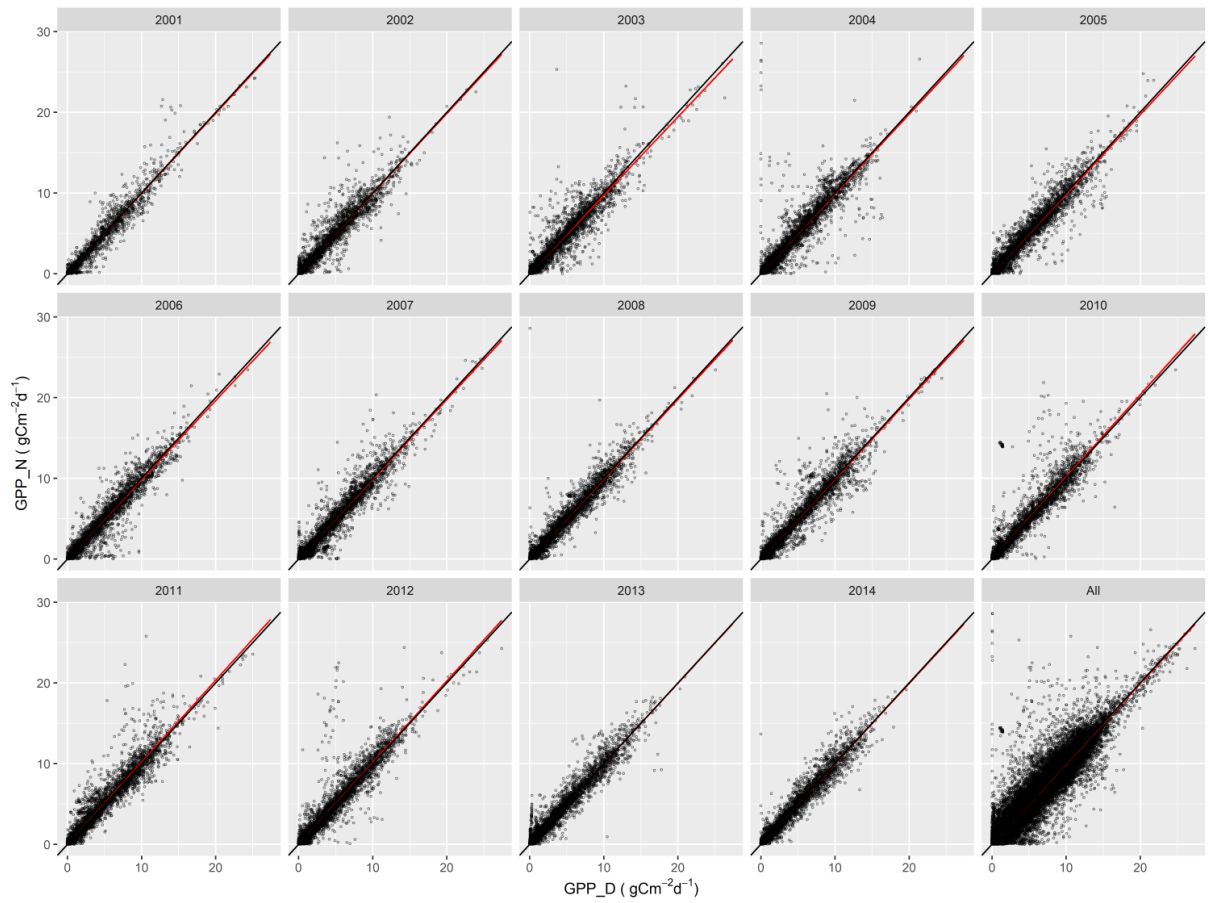

**Figure S2.** There are significant difference between GPP\_N and GPP\_D across all 14 years except 2011, 2012 and 2014.

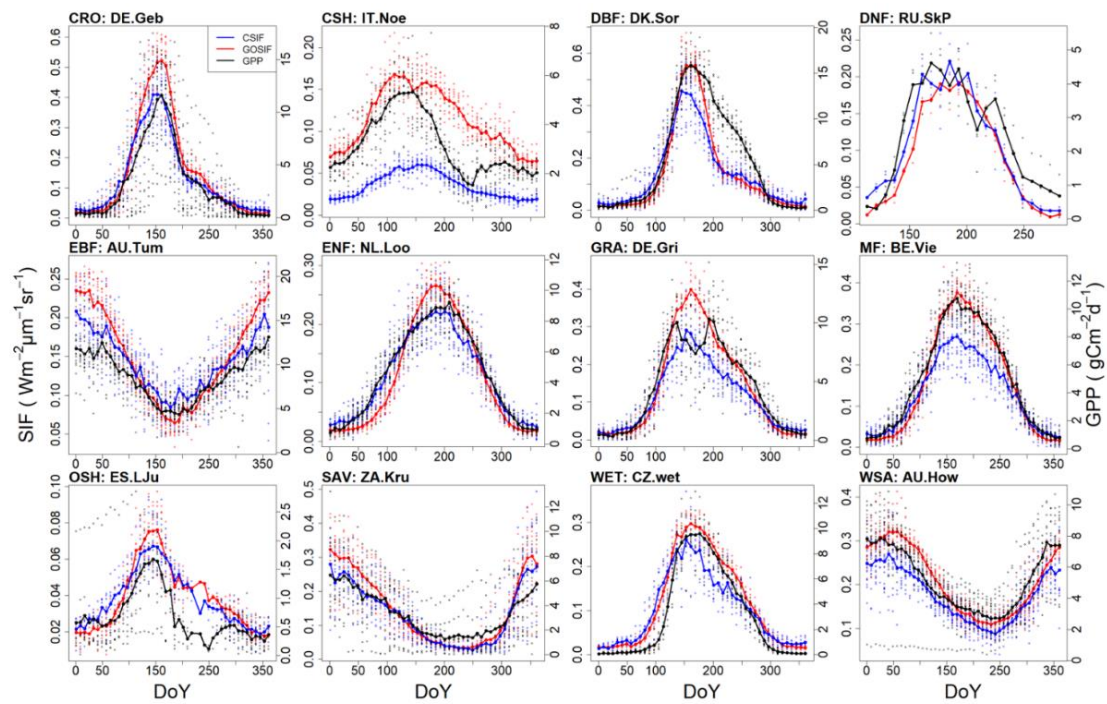

**Figure S3.** Annual change of SIFc (GOSIF (red) and CSIF (blue)) and GPP (black) for 12 biomes at site level.

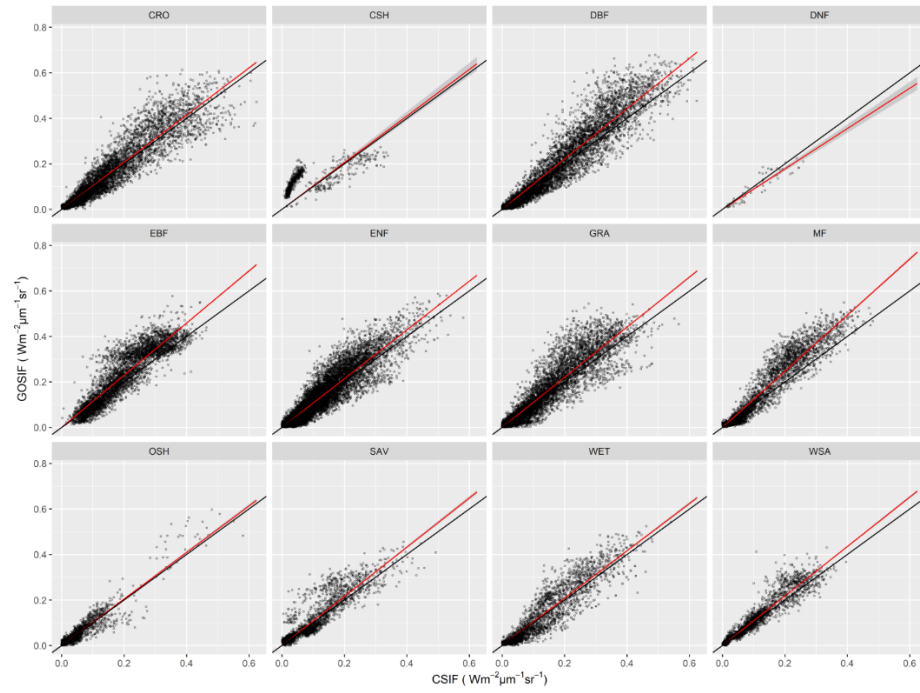

**Figure S4.** There are significant differences between GOSIF and CSIF across all 12 biomes except CSH.

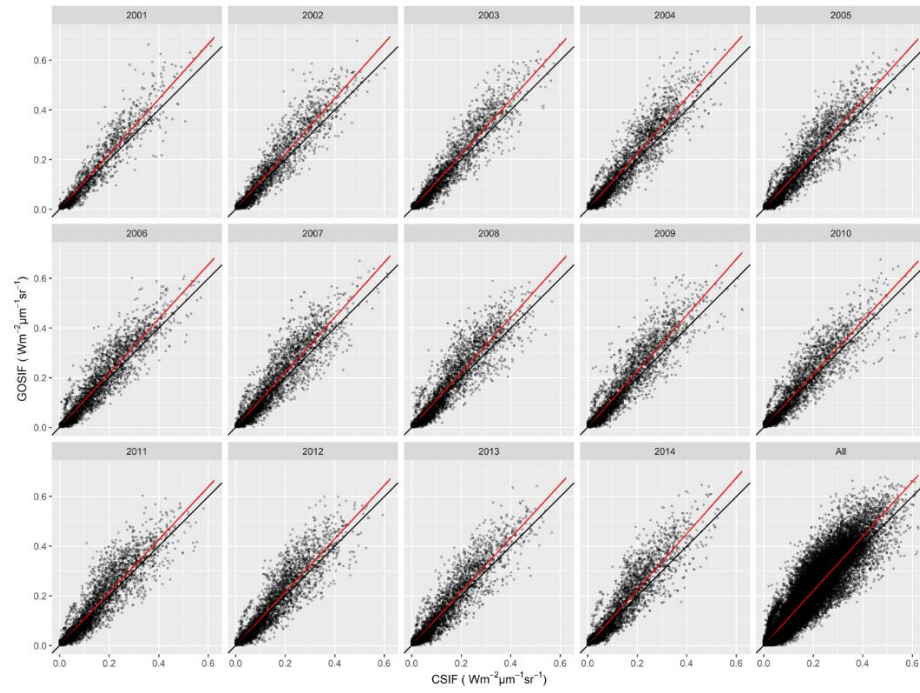

**Figure S5.** There are significant differences between GOSIF and CSIF across all 14 years.

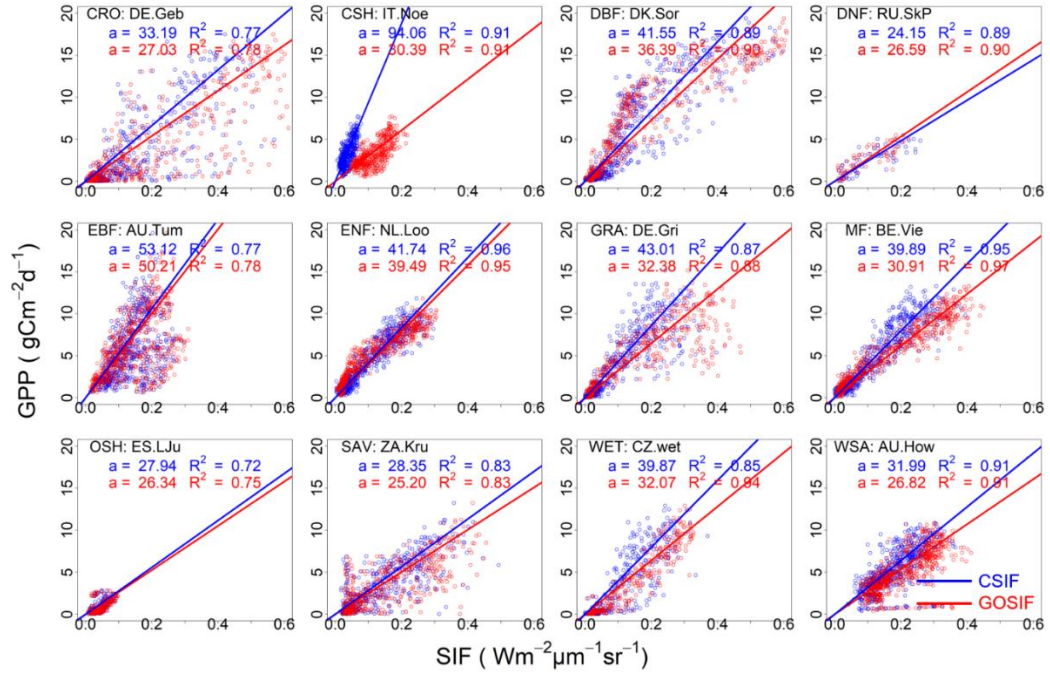

**Figure S6.** Scatter plots and linear regression of GPP\_M and SIFc (CSIF and GOSIF) for 12 individual biomes at site level ( $p < 0.001$ ).

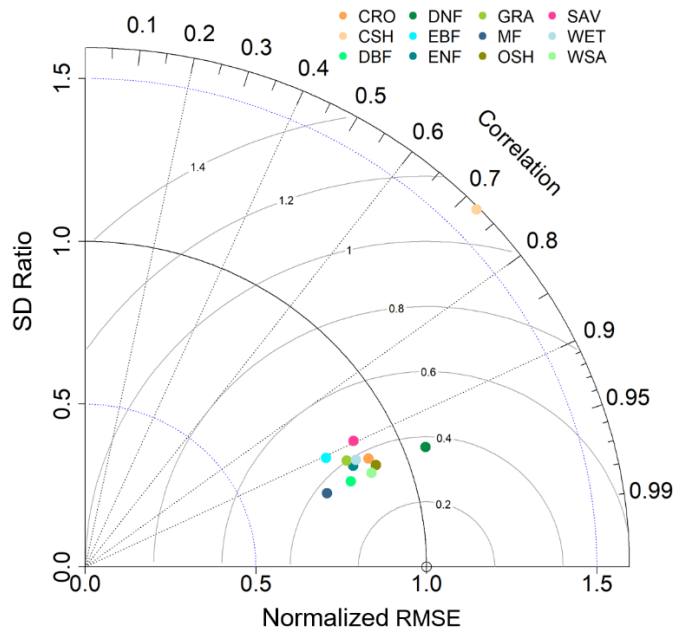

**Figure S7.** The Taylor diagram showing the difference between CSIF and GOSIF across 12 biomes. Color dots represent GPP in the corresponding legend pie. Taylor diagram is a polar graph in which the cosine of the angle between the X-axis is the correlation coefficient between Flux-GPP and modeled GPP (from CSIF and GOSIF). The radial direction is standard deviation (SD). The grey arcs represent RMSE.

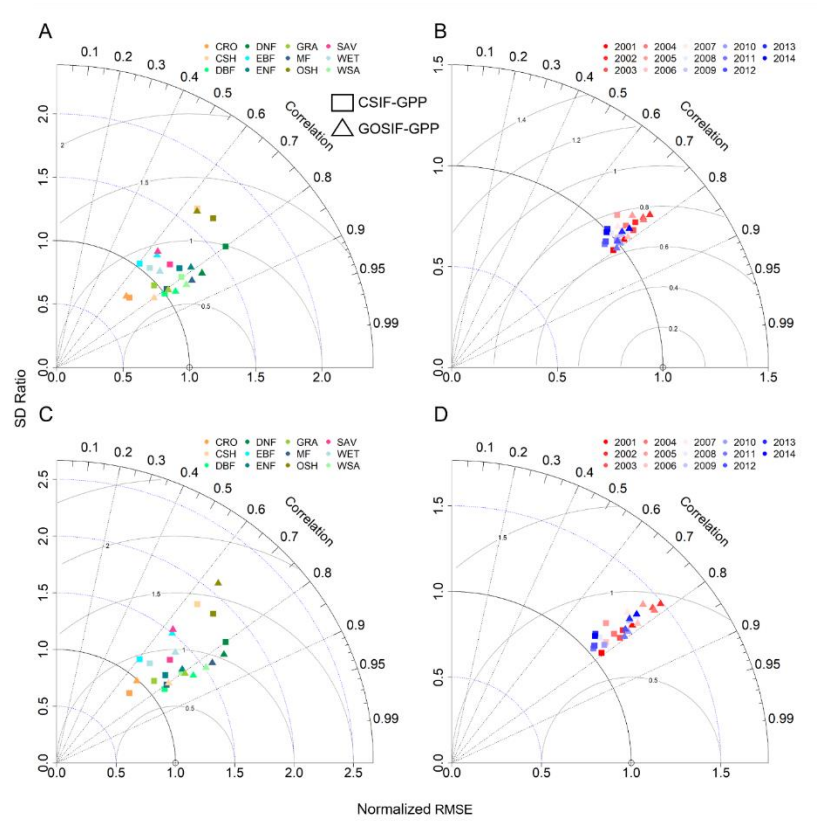

**Figure S8.** The Taylor diagram showing the performance of CSIF\_GPP and GOSIF\_GPP with Flux\_GPP across 12 biomes (A, C) and 14 years (B, D). A and B for median value based two-slope scheme, C and D for mean value based two-slope scheme. Taylor diagram is a polar graph in which the cosine of the angle between the X-axis is the correlation coefficient between Flux-GPP and modeled GPP (from CSIF and GOSIF). The radial direction is the ratio of standard deviation. The grey arcs represent normalized RMSE for each model.



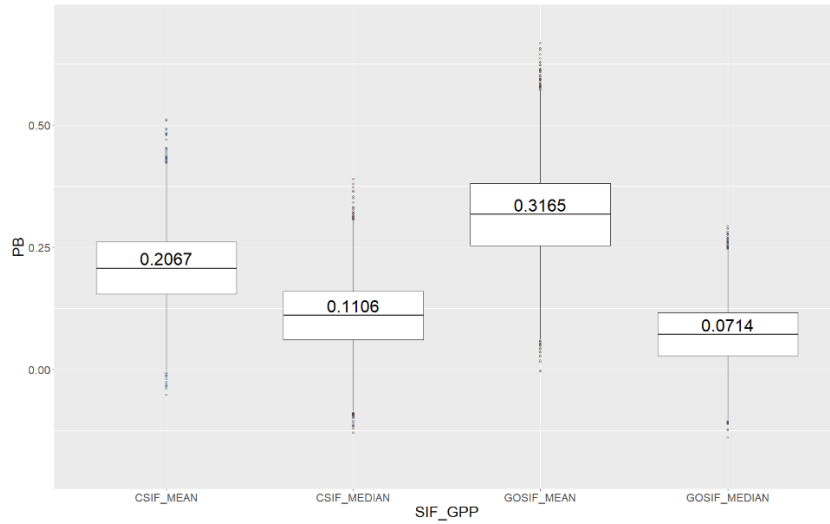

**Figure S9.** PB distribution of SIF\_GPP with EC\_GPP among different SIF\_GPP derived two-slope schemes. PB represents Percentage Bias ( $[\text{sum}(\text{SIF\_GPP}) - \text{sum}(\text{EC\_GPP})] / \text{sum}(\text{EC\_GPP})$ ) for each SIF\_GPP and EC\_GPP combination. CSIF\_MEAN and CSIF\_MEDIAN mean SIF\_GPP derived from CSIF with two-slope scheme based on mean values and median values, respectively. GOSIF\_MEAN and GOSIF\_MEDIAN mean SIF\_GPP derived from GOSIF with two-slope scheme based on mean values and median values, respectively. Each box represents a 10 thousand times random sampling, and each sampling used 80% of the total sites (165) for calibration and 20% (43) sites for validation. And the solid line with corresponding value above represents the median value of each box. There were significant differences among all the groups ( $p < 0.001$ ).

**Table S1.** Introduction of three ecosystem carbon cycle indicators that used in this study. They are GPP\_N, GPP\_D and GPP\_M.

| Abbreviation | Indicator name  | Description                                                                                               |
|--------------|-----------------|-----------------------------------------------------------------------------------------------------------|
| GPP_N        | GPP_NT_VUT_MEAN | From Nighttime partitioning method, average from GPP versions, each from corresponding NEE_VUT_XX version |
| GPP_D        | GPP_DT_VUT_MEAN | From Daytime partitioning method, average from GPP versions, each from corresponding NEE_VUT_XX version   |
| GPP_M        | GPP_MEAN        | The averaged value from both GPPd and GPPn.                                                               |

**Table S2** 208 of 212 FLUXNET2015 Tier-1 sites used in this study. Site descriptions includes site ID, site name, years of data available, latitude, longitude, biome type and correlation coefficient between EC\_GPP with CSIF and GOSIF.

| ID | SITE_ID | SITE_NAME                           | Year      | LAT       | LONG       | IGBP | C3/C4 | Cor-GOSIF | Cor-CSIF |
|----|---------|-------------------------------------|-----------|-----------|------------|------|-------|-----------|----------|
| 1  | AR-SLu  | San Luis                            | 2009-2011 | -33.4648  | -66.4598   | MF   |       | 0.53      | 0.5      |
| 2  | AR-Vir  | Virasoro                            | 2009-2012 | -28.2395  | -56.1886   | ENF  |       | 0.79      | 0.75     |
| 3  | AT-Neu  | Neustift                            | 2002-2012 | 47.11667  | 11.3175    | GRA  |       | 0.79      | 0.69     |
| 4  | AU-Ade  | Adelaide River                      | 2007-2009 | -13.0769  | 131.1178   | WSA  |       | 0.67      | 0.68     |
| 5  | AU-ASM  | Alice Springs                       | 2010-2013 | -22.283   | 133.249    | ENF  |       | 0.86      | 0.87     |
| 6  | AU-Cpr  | Calperum                            | 2010-2014 | -34.0021  | 140.5891   | SAV  |       | 0.8       | 0.76     |
| 7  | AU-Cum  | Cumberland Plain                    | 2012-2014 | -33.61518 | 150.72362  | EBF  |       | 0.64      | 0.59     |
| 8  | AU-DaP  | Daly River Savanna                  | 2007-2013 | -14.0633  | 131.3181   | GRA  |       | 0.79      | 0.81     |
| 9  | AU-DaS  | Daly River Cleared                  | 2008-2014 | -14.1593  | 131.3881   | SAV  |       | 0.79      | 0.81     |
| 10 | AU-Dry  | Dry River                           | 2008-2014 | -15.2588  | 132.3706   | SAV  |       | 0.66      | 0.68     |
| 11 | AU-Emr  | Emerald                             | 2011-2013 | -23.8587  | 148.4746   | GRA  |       | 0.43      | 0.63     |
| 12 | AU-Fog  | Fogg Dam                            | 2006-2008 | -12.5452  | 131.3072   | WET  |       | 0.82      | 0.78     |
| 13 | AU-Gin  | Gingin                              | 2011-2014 | -31.3764  | 115.7138   | WSA  |       | 0.56      | 0.47     |
| 14 | AU-GWW  | Great Western Woodlands             | 2013-2014 | -30.1913  | 120.6541   | SAV  |       | 0.05      | -0.04    |
| 15 | AU-How  | Howard Springs                      | 2001-2014 | -12.4943  | 131.1523   | WSA  |       | 0.7       | 0.71     |
| 16 | AU-Lox  | Loxton                              | 2008-2009 | -34.4704  | 140.6551   | DBF  |       | -0.28     | -0.09    |
| 17 | AU-RDF  | Red Dirt Melon Farm                 | 2011-2013 | -14.5636  | 132.4776   | WSA  |       | 0.4       | 0.45     |
| 18 | AU-Rig  | Riggs Creek                         | 2011-2014 | -36.6499  | 145.5759   | GRA  |       | 0.89      | 0.94     |
| 19 | AU-Rob  | Robson Creek, Queensland, Australia | 2014-2014 | -17.1175  | 145.6301   | EBF  |       | 0.33      | 0.29     |
| 20 | AU-Stp  | Sturt Plains                        | 2008-2014 | -17.1507  | 133.3502   | GRA  | C4    | 0.63      | 0.56     |
| 21 | AU-TTE  | Ti Tree East                        | 2012-2013 | -22.287   | 133.64     | OSH  |       | 0.85      | 0.95     |
| 22 | AU-Tum  | Tumbarumba                          | 2001-2014 | -35.6566  | 148.1517   | EBF  |       | 0.79      | 0.67     |
| 23 | AU-Wac  | Wallaby Creek                       | 2005-2008 | -37.4259  | 145.1878   | EBF  |       | 0.65      | 0.57     |
| 24 | AU-Whr  | Whroo                               | 2011-2014 | -36.6732  | 145.0294   | EBF  |       | 0.71      | 0.56     |
| 25 | AU-Wom  | Wombat                              | 2010-2012 | -37.4222  | 144.0944   | EBF  |       | 0.87      | 0.83     |
| 26 | AU-Ync  | Jaxa                                | 2012-2014 | -34.9893  | 146.2907   | GRA  |       | 0.92      | 0.88     |
| 27 | BE-Bra  | Brasschaat                          | 1996-2014 | 51.30761  | 4.51984    | MF   |       | 0.91      | 0.89     |
| 28 | BE-Lon  | Lonzee                              | 2004-2014 | 50.5516   | 4.74613    | CRO  | C3    | 0.68      | 0.66     |
| 29 | BE-Vie  | Vielsalm                            | 1996-2014 | 50.30496  | 5.99808    | MF   |       | 0.96      | 0.92     |
| 30 | BR-Sa1  | Santarem-Km67-Primary Forest        | 2002-2011 | -2.85667  | -54.95889  | EBF  |       | 0.27      | 0.26     |
| 31 | BR-Sa3  | Santarem-Km83-Logged Forest         | 2000-2004 | -3.01803  | -54.97144  | EBF  |       | 0.21      | 0.02     |
| 32 | CA-Gro  | Ontario - Groundhog River           | 2003-2014 | 48.2167   | -82.1556   | MF   |       | 0.89      | 0.87     |
| 33 | CA-Man  | Manitoba - Northern                 | 1994-2008 | 55.87962  | -98.48081  | ENF  |       | 0.46      | 0.46     |
| 34 | CA-NS1  | UCI-1850 burn site                  | 2001-2005 | 55.87917  | -98.48389  | ENF  |       | 0.82      | 0.81     |
| 35 | CA-NS2  | UCI-1930 burn site                  | 2001-2005 | 55.90583  | -98.52472  | ENF  |       | 0.82      | 0.79     |
| 36 | CA-NS3  | UCI-1964 burn site                  | 2001-2005 | 55.91167  | -98.38222  | ENF  |       | 0.89      | 0.85     |
| 37 | CA-NS4  | UCI-1964 burn site wet              | 2002-2005 | 55.91437  | -98.380645 | ENF  |       | 0.81      | 0.73     |
| 38 | CA-NS5  | UCI-1981 burn site                  | 2001-2005 | 55.86306  | -98.485    | ENF  |       | 0.86      | 0.83     |
| 39 | CA-NS6  | UCI-1989 burn site                  | 2001-2005 | 55.91667  | -98.96444  | OSH  |       | 0.86      | 0.83     |

|    |        |                               |           |             |              |     |    |      |      |
|----|--------|-------------------------------|-----------|-------------|--------------|-----|----|------|------|
| 40 | CA-NS7 | UCI-1998 burn site            | 2002-2005 | 56.63583    | -99.94833    | OSH |    | 0.87 | 0.82 |
| 41 | CA-Oas | Saskatchewan - Western Boreal | 1996-2010 | 53.62889    | -106.19779   | DBF |    | 0.97 | 0.95 |
| 42 | CA-Obs | Saskatchewan - Western Boreal | 1997-2010 | 53.98717    | -105.11779   | ENF |    | 0.93 | 0.91 |
| 43 | CA-Qfo | Quebec - Eastern Boreal       | 2003-2010 | 49.6925     | -74.34206    | ENF |    | 0.89 | 0.86 |
| 44 | CA-SF1 | Saskatchewan - Western Boreal | 2003-2006 | 54.48503    | -105.81757   | ENF |    | 0.88 | 0.89 |
| 45 | CA-SF2 | Saskatchewan - Western Boreal | 2001-2005 | 54.25392    | -105.8775    | ENF |    | 0.89 | 0.9  |
| 46 | CA-SF3 | Saskatchewan - Western Boreal | 2001-2006 | 54.09156    | -106.00526   | OSH |    | 0.93 | 0.91 |
| 47 | CA-TP1 | Ontario - Turkey              | 2002-2014 | 42.66093611 | -80.55951944 | ENF |    | 0.65 | 0.63 |
| 48 | CA-TP2 | Ontario - Turkey              | 2002-2007 | 42.77441944 | -80.458775   | ENF |    | 0.78 | 0.78 |
| 49 | CA-TP3 | Ontario - Turkey              | 2002-2014 | 42.70681111 | -80.34831389 | ENF |    | 0.85 | 0.84 |
| 50 | CA-TP4 | Ontario - Turkey              | 2002-2014 | 42.710161   | -80.357376   | ENF |    | 0.83 | 0.86 |
| 51 | CA-TPD | Ontario - Turkey              | 2012-2014 | 42.635328   | -80.557731   | DBF |    | 0.89 | 0.95 |
| 52 | CG-Tch | Tchizalamou                   | 2006-2009 | -4.28917    | 11.65642     | SAV |    | 0.51 | 0.54 |
| 53 | CH-Cha | Chamau                        | 2005-2014 | 47.21022    | 8.41044      | GRA |    | 0.84 | 0.81 |
| 54 | CH-Dav | Davos                         | 1997-2014 | 46.81533    | 9.85591      | ENF |    | 0.73 | 0.73 |
| 55 | CH-Fru | Früebüel                      | 2005-2014 | 47.11583    | 8.53778      | GRA |    | 0.9  | 0.88 |
| 56 | CH-Lae | Laegern                       | 2004-2014 | 47.47808    | 8.365        | MF  |    | 0.94 | 0.89 |
| 57 | CH-Oe1 | Oensingen grassland           | 2002-2008 | 47.28583    | 7.73194      | GRA |    | 0.77 | 0.76 |
| 58 | CH-Oe2 | Oensingen crop                | 2004-2014 | 47.28631    | 7.73433      | CRO |    | 0.62 | 0.63 |
| 59 | CN-Cha | Changbaishan                  | 2003-2005 | 42.4025     | 128.0958     | MF  |    | 0.97 | 0.92 |
| 60 | CN-Cng | Changling                     | 2007-2010 | 44.5934     | 123.5092     | GRA |    | 0.92 | 0.93 |
| 61 | CN-Dan | Dangxiong                     | 2004-2005 | 30.4978     | 91.0664      | GRA |    | 0.82 | 0.81 |
| 62 | CN-Din | Dinghushan                    | 2003-2005 | 23.1733     | 112.5361     | EBF |    | 0.57 | 0.62 |
| 63 | CN-Du2 | Duolun_grassland (D01)        | 2006-2008 | 42.0467     | 116.2836     | GRA |    | 0.78 | 0.8  |
| 64 | CN-Du3 | Duolun Degraded Meadow        | 2009-2010 | 42.0551     | 116.2809     | GRA |    | 0.08 | 0.11 |
| 65 | CN-Ha2 | Haibei Shrubland              | 2003-2005 | 37.6086     | 101.3269     | WET |    | 0.97 | 0.95 |
| 66 | CN-HaM | Haibei Alpine Tibet site      | 2002-2004 | 37.37       | 101.18       | GRA |    | 0.9  | 0.8  |
| 67 | CN-Qia | Qianyanzhou                   | 2003-2005 | 26.7414     | 115.0581     | ENF |    | 0.9  | 0.86 |
| 68 | CN-Sw2 | Siziwang Grazed (SZWG)        | 2010-2012 | 41.7902     | 111.8971     | GRA |    | 0.12 | 0.35 |
| 69 | CZ-BK1 | Bily Kriz forest              | 2004-2008 | 49.50213    | 18.53686     | ENF |    | 0.83 | 0.82 |
| 70 | CZ-BK2 | Bily Kriz grassland           | 2004-2006 | 49.49443    | 18.54285     | GRA |    | 0.9  | 0.88 |
| 71 | CZ-wet | Trebon (CZECHWET)             | 2006-2014 | 49.02465    | 14.77035     | WET |    | 0.94 | 0.84 |
| 72 | DE-Akm | Anklam                        | 2009-2014 | 53.86617    | 13.68342     | WET |    | 0.78 | 0.67 |
| 73 | DE-Geb | Gebesee                       | 2001-2014 | 51.1001     | 10.9143      | CRO |    | 0.8  | 0.79 |
| 74 | DE-Gri | Grillenburg                   | 2004-2014 | 50.95004    | 13.51259     | GRA |    | 0.84 | 0.83 |
| 75 | DE-Hai | Hainich                       | 2000-2012 | 51.07917    | 10.453       | DBF |    | 0.81 | 0.81 |
| 76 | DE-Kli | Klingenberg                   | 2004-2014 | 50.89306    | 13.52238     | CRO | C4 | 0.66 | 0.62 |
| 77 | DE-Lkb | Lackenberg                    | 2009-2013 | 49.09962    | 13.30467     | ENF |    | 0.94 | 0.88 |
| 78 | DE-Lnf | Leinefelde                    | 2002-2012 | 51.32822    | 10.3678      | DBF |    | 0.84 | 0.8  |
| 79 | DE-Obe | Oberbärenburg                 | 2008-2014 | 50.78666    | 13.72129     | ENF |    | 0.92 | 0.91 |
| 80 | DE-RuR | Rollesbroich                  | 2011-2014 | 50.62191    | 6.30413      | GRA |    | 0.87 | 0.85 |
| 81 | DE-RuS | Selhausen Juelich             | 2011-2014 | 50.86591    | 6.44717      | CRO |    | 0.72 | 0.64 |
| 82 | DE-Seh | Selhausen                     | 2007-2010 | 50.87062    | 6.44965      | CRO | C3 | 0.73 | 0.72 |
| 83 | DE-SfN | Schechenfilz Nord             | 2012-2014 | 47.80639    | 11.3275      | WET |    | 0.81 | 0.8  |

|     |        |                              |           |          |           |     |    |      |      |
|-----|--------|------------------------------|-----------|----------|-----------|-----|----|------|------|
| 84  | DE-Spw | Spreewald                    | 2010-2014 | 51.89225 | 14.03369  | WET |    | 0.91 | 0.88 |
| 85  | DE-Tha | Tharandt                     | 1996-2014 | 50.96235 | 13.56516  | ENF |    | 0.92 | 0.86 |
| 86  | DE-Zrk | Zarnekow                     | 2013-2014 | 53.87594 | 12.88901  | WET |    | 0.84 | 0.8  |
| 87  | DK-Eng | Enghave                      | 2005-2008 | 55.69053 | 12.19175  | GRA |    | 0.75 | 0.77 |
| 88  | DK-Fou | Foulum                       | 2005-2005 | 56.4842  | 9.58722   | CRO |    | 0.57 | 0.49 |
| 89  | DK-NuF | Nuuk Fen                     | 2008-2014 | 64.13083 | -51.38611 | WET |    | 0.63 | 0.83 |
| 90  | DK-Sor | Soroe                        | 1996-2014 | 55.48587 | 11.64464  | DBF |    | 0.91 | 0.88 |
| 91  | DK-ZaF | Zackenbergh Fen              | 2008-2011 | 74.48143 | -20.55452 | WET |    | 0.77 | 0.93 |
| 92  | DK-ZaH | Zackenbergh Heath            | 2000-2014 | 74.47328 | -20.5503  | GRA |    | 0.56 | 0.81 |
| 93  | ES-Amo | Amoladeras                   | 2007-2012 | 36.83361 | -2.25232  | OSH |    | 0.44 | 0.64 |
| 94  | ES-LgS | Laguna Seca                  | 2007-2009 | 37.09794 | -2.96583  | OSH |    | 0.92 | 0.86 |
| 95  | ES-LJu | Llano de los Juanes          | 2004-2013 | 36.92659 | -2.75212  | OSH |    | 0.67 | 0.61 |
| 96  | ES-Ln2 | Lanjaron-Salvage logging     | 2009-2009 | 36.9695  | -3.47582  | OSH |    | 0.12 | 0.01 |
| 97  | FI-Hyy | Hyytiala                     | 1996-2014 | 61.84741 | 24.29477  | ENF |    | 0.96 | 0.92 |
| 98  | FI-Jok | Jokioinen                    | 2000-2003 | 60.8986  | 23.51345  | CRO | C3 | 0.89 | 0.84 |
| 99  | FI-Let | Lettosuo                     | 2009-2012 | 60.64183 | 23.95952  | ENF |    | 0.93 | 0.91 |
| 100 | FI-Lom | Lompolojankka                | 2007-2009 | 67.99724 | 24.20918  | WET |    | 0.98 | 0.9  |
| 101 | FI-Sod | Sodankyla                    | 2001-2014 | 67.36239 | 26.63859  | ENF |    | 0.92 | 0.88 |
| 102 | FR-Fon | Fontainebleau-Barbeau        | 2005-2014 | 48.47636 | 2.7801    | DBF |    | 0.81 | 0.77 |
| 103 | FR-Gri | Grignon                      | 2004-2013 | 48.84422 | 1.95191   | CRO | C4 | 0.64 | 0.65 |
| 104 | FR-LBr | Le Bray                      | 1996-2008 | 44.71711 | -0.7693   | ENF |    | 0.86 | 0.83 |
| 105 | FR-Pue | Puechabon                    | 2000-2014 | 43.7413  | 3.5957    | EBF |    | 0.64 | 0.62 |
| 106 | GF-Guy | Guyaflex (French Guiana)     | 2004-2014 | 5.27877  | -52.92486 | EBF |    | 0.1  | 0.26 |
| 107 | GH-Ank | Ankasa                       | 2011-2014 | 5.26854  | -2.69421  | EBF |    | 0.12 | 0.33 |
| 108 | IT-BCi | Borgo Cioffi                 | 2004-2014 | 40.52375 | 14.95744  | CRO |    | 0.54 | 0.42 |
| 109 | IT-CA1 | Castel d'Asso1               | 2011-2014 | 42.38041 | 12.02656  | DBF |    | 0.64 | 0.54 |
| 110 | IT-CA2 | Castel d'Asso2               | 2011-2014 | 42.37722 | 12.02604  | CRO | C3 | 0.55 | 0.55 |
| 111 | IT-CA3 | Castel d'Asso 3              | 2011-2014 | 42.38    | 12.0222   | DBF |    | 0.52 | 0.37 |
| 112 | IT-Col | Collelongo                   | 1996-2014 | 41.84936 | 13.58814  | DBF |    | 0.88 | 0.87 |
| 113 | IT-Cp2 | Castelporziano2              | 2012-2014 | 41.70427 | 12.35729  | EBF |    | 0.74 | 0.74 |
| 114 | IT-Cpz | Castelporziano               | 1997-2009 | 41.70525 | 12.37611  | EBF |    | 0.65 | 0.76 |
| 115 | IT-Isp | Ispra ABC-IS                 | 2013-2014 | 45.81264 | 8.63358   | DBF |    | 0.97 | 0.94 |
| 116 | IT-La2 | Lavarone2                    | 2000-2002 | 45.9542  | 11.2853   | ENF |    | 0.77 | 0.75 |
| 117 | IT-Lav | Lavarone                     | 2003-2014 | 45.9562  | 11.28132  | ENF |    | 0.83 | 0.85 |
| 118 | IT-MBo | Monte Bondone                | 2003-2013 | 46.01468 | 11.04583  | GRA |    | 0.94 | 0.93 |
| 119 | IT-Noe | Arca di Noe - Le Prigionette | 2004-2014 | 40.60618 | 8.15117   | CSH |    | 0.69 | 0.74 |
| 120 | IT-PT1 | Parco Ticino forest          | 2002-2004 | 45.20087 | 9.06104   | DBF |    | 0.79 | 0.85 |
| 121 | IT-Ren | Renon                        | 1998-2013 | 46.58686 | 11.43369  | ENF |    | 0.94 | 0.92 |
| 122 | IT-Ro1 | Roccarespampani 1            | 2000-2008 | 42.40812 | 11.93001  | DBF |    | 0.63 | 0.55 |
| 123 | IT-Ro2 | Roccarespampani 2            | 2002-2012 | 42.39026 | 11.92093  | DBF |    | 0.56 | 0.72 |
| 124 | IT-SR2 | San Rossore 2                | 2013-2014 | 43.73203 | 10.29095  | ENF |    | 0.95 | 0.94 |
| 125 | IT-Tor | Torgnon                      | 2008-2014 | 45.84444 | 7.57806   | GRA |    | 0.95 | 0.91 |
| 126 | JP-MBF | Moshiri Birch Forest Site    | 2003-2005 | 44.3869  | 142.3186  | DBF |    | 0.95 | 0.92 |
| 127 | JP-SMF | Seto Mixed Forest Site       | 2002-2006 | 35.2617  | 137.0788  | MF  |    | 0.88 | 0.87 |

|     |        |                                        |           |            |            |     |       |       |      |
|-----|--------|----------------------------------------|-----------|------------|------------|-----|-------|-------|------|
| 128 | MY-PSO | Pasoh Forest Reserve (PSO)             | 2003-2009 | 2.973      | 102.3062   | EBF |       | 0.21  | 0.21 |
| 129 | NL-Hor | Horstermeer                            | 2004-2011 | 52.24035   | 5.0713     | GRA |       | 0.92  | 0.87 |
| 130 | NL-Loo | Loobos                                 | 1996-2013 | 52.16658   | 5.74356    | ENF |       | 0.94  | 0.93 |
| 131 | NO-Adv | Adventdalen                            | 2011-2014 | 78.186     | 15.923     | WET |       | -0.09 | 0.27 |
| 132 | PA-SPn | Sardinilla Plantation                  | 2007-2009 | 9.31814    | -79.6346   | DBF |       | 0.58  | 0.09 |
| 133 | PA-SPs | Sardinilla-Pasture                     | 2007-2009 | 9.31378    | -79.63143  | GRA |       | 0.48  | 0.07 |
| 134 | RU-Che | Cherski                                | 2002-2005 | 68.61304   | 161.34143  | WET |       | 0.53  | 0.56 |
| 135 | RU-Cok | Chokurdakh                             | 2003-2014 | 70.82914   | 147.49428  | OSH |       | 0.7   | 0.72 |
| 136 | RU-Fyo | Fyodorovskoye                          | 1998-2014 | 56.46153   | 32.92208   | ENF |       | 0.93  | 0.9  |
| 137 | RU-Ha1 | Hakasia steppe                         | 2002-2004 | 54.72517   | 90.00215   | GRA |       | 0.82  | 0.82 |
| 138 | RU-Sam | Samoylov                               | 2002-2014 | 72.3738    | 126.4958   | GRA |       | 0.28  | 0.43 |
| 139 | RU-SkP | Yakutsk Spasskaya Pad larch            | 2012-2014 | 62.255     | 129.168    | DNF |       | 0.83  | 0.8  |
| 140 | RU-Tks | Tiksi                                  | 2010-2014 | 71.59427   | 128.88782  | GRA |       | 0.82  | 0.9  |
| 141 | RU-Vrk | Seida/Vorkuta                          | 2008-2008 | 67.05468   | 62.94047   | CSH |       | 0.98  | 0.83 |
| 142 | SD-Dem | Demokeya                               | 2005-2009 | 13.2829    | 30.4783    | SAV |       | 0.6   | 0.56 |
| 143 | SE-St1 | Stordalen grassland                    | 2012-2014 | 68.35415   | 19.05033   | WET |       | 0.88  | 0.83 |
| 144 | SN-Dhr | Dahra                                  | 2010-2013 | 15.40278   | -15.43222  | SAV |       | 0.71  | 0.73 |
| 145 | US-AR1 | ARM USDA UNL OSU Woodward              | 2009-2012 | 36.4267    | -99.42     | GRA |       | 0.73  | 0.75 |
| 146 | US-AR2 | ARM USDA UNL OSU Woodward              | 2009-2012 | 36.6358    | -99.5975   | GRA |       | 0.72  | 0.74 |
| 147 | US-ARb | ARM Southern Great Plains              | 2005-2006 | 35.5497    | -98.0402   | GRA |       | 0.87  | 0.78 |
| 148 | US-ARc | ARM Southern Great Plains              | 2005-2006 | 35.54649   | -98.04     | GRA |       | 0.92  | 0.84 |
| 149 | US-ARM | ARM Southern Great Plains              | 2003-2012 | 36.6058    | -97.4888   | CRO | C3+C4 | 0.74  | 0.75 |
| 150 | US-Atq | Atqasuk                                | 2003-2008 | 70.4696    | -157.4089  | WET |       | 0.81  | 0.81 |
| 151 | US-Blo | Blodgett Forest                        | 1997-2007 | 38.8953    | -120.6328  | ENF |       | 0.93  | 0.9  |
| 152 | US-Cop | Corral Pocket                          | 2001-2007 | 38.09      | -109.39    | GRA |       | 0.39  | 0.48 |
| 153 | US-CRT | Curtice Walter-Berger cropland         | 2011-2013 | 41.628495  | -83.347086 | CRO | C3    | 0.74  | 0.77 |
| 154 | US-GBT | GLEES Brooklyn Tower                   | 1999-2006 | 41.36579   | -106.2397  | ENF |       | 0.91  | 0.86 |
| 155 | US-GLE | GLEES                                  | 2004-2014 | 41.36653   | -106.2399  | ENF |       | 0.92  | 0.88 |
| 156 | US-Goo | Goodwin Creek                          | 2002-2006 | 34.2547    | -89.8735   | GRA |       | 0.82  | 0.83 |
| 157 | US-Ha1 | Harvard Forest EMS Tower (HFR1)        | 1991-2012 | 42.5378    | -72.1715   | DBF |       | 0.96  | 0.92 |
| 158 | US-IB2 | Fermi National Accelerator Laboratory  | 2004-2011 | 41.84062   | -88.24103  | GRA |       | 0.85  | 0.83 |
| 159 | US-Ivo | Ivotuk                                 | 2004-2007 | 68.4865    | -155.7503  | WET |       | 0.95  | 0.88 |
| 160 | US-KS1 | Kennedy Space Center (slash pine)      | 2002-2002 | 28.4583    | -80.6709   | ENF |       | 0.83  | 0.87 |
| 161 | US-KS2 | Kennedy Space Center (scrub oak)       | 2003-2006 | 28.6086    | -80.6715   | CSH |       | 0.85  | 0.72 |
| 162 | US-Lin | Lindcove Orange Orchard                | 2009-2010 | 36.3566    | -119.8423  | CRO | C3    | 0.45  | 0.37 |
| 163 | US-Los | Lost Creek                             | 2000-2014 | 46.0827    | -89.9792   | WET |       | 0.85  | 0.84 |
| 164 | US-Me1 | Metolius - Eyerly burn                 | 2004-2005 | 44.5794    | -121.5     | ENF |       | 0.7   | 0.81 |
| 165 | US-Me2 | Metolius mature ponderosa pine         | 2002-2014 | 44.4523    | -121.5574  | ENF |       | 0.83  | 0.87 |
| 166 | US-Me3 | Metolius-second young aged pine        | 2004-2009 | 44.3154    | -121.6078  | ENF |       | 0.68  | 0.78 |
| 167 | US-Me5 | Metolius-first young aged pine         | 2000-2002 | 44.43719   | -121.56676 | ENF |       | 0.82  | 0.81 |
| 168 | US-Me6 | Metolius Young Pine Burn               | 2010-2014 | 44.3232842 | -121.6078  | ENF |       | 0.64  | 0.75 |
| 169 | US-MMS | Morgan Monroe State Forest             | 1999-2014 | 39.3232    | -86.4131   | DBF |       | 0.96  | 0.93 |
| 170 | US-Myb | Mayberry Wetland                       | 2010-2014 | 38.049861  | -121.76498 | WET |       | 0.58  | 0.26 |
| 171 | US-Ne1 | Mead - irrigated continuous maize site | 2001-2013 | 41.16506   | -96.47664  | CRO | C4    | 0.84  | 0.87 |

|     |        |                                            |           |            |             |     |       |      |      |
|-----|--------|--------------------------------------------|-----------|------------|-------------|-----|-------|------|------|
| 172 | US-Ne2 | Mead - irrigated maize-soybean rotation    | 2001-2013 | 41.16487   | -96.4701    | CRO | C3+C4 | 0.81 | 0.8  |
| 173 | US-Ne3 | Mead - rainfed maize-soybean rotation site | 2001-2013 | 41.17967   | -96.43965   | CRO | C3+C4 | 0.86 | 0.89 |
| 174 | US-NR1 | Niwot Ridge Forest (LTER NWT1)             | 1998-2014 | 40.0329    | -105.5464   | ENF |       | 0.92 | 0.85 |
| 175 | US-Oho | Oak Openings                               | 2004-2013 | 41.5545    | -83.8438    | DBF |       | 0.97 | 0.93 |
| 176 | US-ORv | Olentangy River Wetland Research Park      | 2011-2011 | 40.0201    | -83.0183    | WET |       | 0.95 | 0.91 |
| 177 | US-PFa | Park Falls/WLEF                            | 1995-2014 | 45.9459    | -90.2723    | MF  |       | 0.95 | 0.93 |
| 178 | US-Prr | Poker Flat Research Range Black Spruce     | 2010-2013 | 65.12367   | -147.48756  | ENF |       | 0.82 | 0.76 |
| 179 | US-SRC | Santa Rita Creosote                        | 2008-2014 | 31.9083    | -110.8395   | MF  |       | 0.68 | 0.82 |
| 180 | US-SRG | Santa Rita Grassland                       | 2008-2014 | 31.789379  | -110.827675 | GRA |       | 0.88 | 0.91 |
| 181 | US-SRM | Santa Rita Mesquite                        | 2004-2014 | 31.8214    | -110.8661   | WSA |       | 0.86 | 0.84 |
| 182 | US-Sta | Saratoga                                   | 2005-2009 | 41.3966    | -106.8024   | OSH |       | 0.51 | 0.53 |
| 183 | US-Syv | Sylvania Wilderness Area                   | 2001-2014 | 46.242     | -89.3477    | MF  |       | 0.91 | 0.9  |
| 184 | US-Ton | Tonzi Ranch                                | 2001-2014 | 38.4316    | -120.96598  | WSA |       | 0.87 | 0.79 |
| 185 | US-Tw1 | Twitchell Wetland West Pond                | 2012-2014 | 38.1074    | -121.6469   | WET |       | 0.72 | 0.74 |
| 186 | US-Tw2 | Twitchell Corn                             | 2012-2013 | 38.1047    | -121.6433   | CRO |       | 0.65 | 0.64 |
| 187 | US-Tw3 | Twitchell Alfalfa                          | 2013-2014 | 38.1159    | -121.6467   | CRO | C3    | 0.47 | 0.59 |
| 188 | US-Tw4 | Twitchell East End Wetland                 | 2013-2014 | 38.10298   | -121.6414   | Wet |       | 0.53 | 0.57 |
| 189 | US-Twt | Twitchell Island                           | 2009-2014 | 38.1087204 | -121.6531   | CRO | C3    | 0.89 | 0.86 |
| 190 | US-UMB | Univ. of Mich. Biological Station          | 2000-2014 | 45.5598    | -84.7138    | DBF |       | 0.97 | 0.94 |
| 191 | US-UMd | UMBS Disturbance                           | 2007-2014 | 45.5625    | -84.6975    | DBF |       | 0.79 | 0.82 |
| 192 | US-Var | Vaira Ranch- Ione                          | 2000-2014 | 38.4133    | -120.9507   | GRA |       | 0.87 | 0.87 |
| 193 | US-WCr | Willow Creek                               | 1999-2014 | 45.8059    | -90.0799    | DBF |       | 0.97 | 0.94 |
| 194 | US-Whs | Walnut Gulch Lucky Hills Shrub             | 2007-2014 | 31.7438    | -110.0522   | OSH |       | 0.79 | 0.85 |
| 195 | US-Wi0 | Young red pine (YRP)                       | 2002-2002 | 46.618778  | -91.081444  | ENF |       | 0.9  | 0.9  |
| 196 | US-Wi1 | Intermediate hardwood (IHW)                | 2003-2003 | 46.730472  | -91.232944  | DBF |       | 0.95 | 0.88 |
| 197 | US-Wi2 | Intermediate red pine (IRP)                | 2003-2003 | 46.686889  | -91.152833  | ENF |       | 0.51 | 0.55 |
| 198 | US-Wi3 | Mature hardwood (MHW)                      | 2002-2004 | 46.634722  | -91.098667  | DBF |       | 0.98 | 0.96 |
| 199 | US-Wi4 | Mature red pine (MRP)                      | 2002-2005 | 46.739333  | -91.16625   | ENF |       | 0.87 | 0.87 |
| 200 | US-Wi5 | Mixed young jack pine (MYJP)               | 2004-2004 | 46.653083  | -91.085806  | ENF |       | 0.95 | 0.89 |
| 201 | US-Wi6 | Pine barrens #1 (PB1)                      | 2002-2003 | 46.624889  | -91.298222  | OSH |       | 0.82 | 0.81 |
| 202 | US-Wi7 | Red pine clearcut (RPCC)                   | 2005-2005 | 46.649111  | -91.069278  | OSH |       | 0.93 | 0.89 |
| 203 | US-Wi8 | Young hardwood clearcut (YHW)              | 2002-2002 | 46.722333  | -91.252417  | DBF |       | 0.99 | 0.95 |
| 204 | US-Wi9 | Young Jack pine (YJP)                      | 2004-2005 | 46.618778  | -91.081444  | ENF |       | 0.8  | 0.79 |
| 205 | US-Wkg | Walnut Gulch Kendall Grasslands            | 2004-2014 | 31.7365    | -109.9419   | GRA |       | 0.83 | 0.88 |
| 206 | US-WPT | Winous Point North Marsh                   | 2011-2013 | 41.464639  | -82.996157  | WET |       | 0.83 | 0.84 |
| 207 | ZA-Kru | Skukuza                                    | 2000-2010 | -25.0197   | 31.4969     | SAV |       | 0.75 | 0.76 |
| 208 | ZM-Mon | Mongu                                      | 2000-2009 | -15.43778  | 23.25278    | DBF |       | 0.62 | 0.61 |
| 209 | IT-SRo | San Rossore                                | 1999-2012 | 43.72768   | 10.28444    | ENF |       |      |      |
| 210 | NO-Blv | Bayelva, Spitsbergen                       | 2008-2009 | 78.92163   | 11.83109    | SNO |       |      |      |
| 211 | US-LWW | Little Washita Watershed                   | 1997-1998 | 34.9604    | -97.9789    | GRA |       |      |      |
| 212 | US-Me4 | Metolius-old aged ponderosa pine           | 1996-2000 | 44.4992    | -121.6224   | ENF |       |      |      |

**Table S3.** The definition of 12 IGBP land cover types (biomes) used in this study referred to Belward [1] and Loveland, Reed [2]

| IGBP | Code | Class name                  | Number of site | Definition                                                                                                                                                                                                                         |
|------|------|-----------------------------|----------------|------------------------------------------------------------------------------------------------------------------------------------------------------------------------------------------------------------------------------------|
| CRO  | 12   | Croplands                   | 20             | Lands covered with temporary crops followed by harvest and a bare soil period (e.g., single and multiple cropping systems). Note that perennial woody crops will be classified as the appropriate forest or shrub land cover type. |
| CSH  | 6    | Closed Shrublands           | 3              | Lands with woody vegetation less than 2 m tall and with shrub canopy cover >60%. The shrub foliage can be either evergreen or deciduous.                                                                                           |
| DBF  | 4    | Deciduous Broadleaf Forest  | 26             | Lands dominated by woody vegetation with a percent cover >60% and height exceeding 2 m. Consists of broadleaf tree communities with an annual cycle of leaf-on and leaf-off periods.                                               |
| DNF  | 3    | Deciduous Needleleaf Forest | 1              | Lands dominated by woody vegetation with a percent cover >60% and height exceeding 2 m. Consists of seasonal needleleaf tree communities with an annual cycle of leaf-on and leaf-off periods                                      |
| EBF  | 2    | Evergreen Broadleaf Forest  | 15             | Lands dominated by broadleaf woody vegetation with a percent cover >60% and height exceeding 2 m. Almost all trees and shrubs remain green year round. Canopy is never without green foliage.                                      |
| ENF  | 1    | Evergreen Needleleaf Forest | 48             | Lands dominated by needleleaf woody vegetation with a percent cover >60% and height exceeding 2 m. Almost all trees remain green all year. Canopy is never without green foliage.                                                  |
| GRA  | 10   | Grasslands                  | 37             | Lands with herbaceous types of cover. Tree and shrub cover is less than 10%.                                                                                                                                                       |
| MF   | 5    | Mixed Forests               | 9              | Lands dominated by trees with a percent cover >60% and height exceeding 2 m. Consists of tree communities with interspersed mixtures or mosaics of the other four forest types. None of the forest types exceeds 60% of landscape  |
| OSH  | 7    | Open Shrublands             | 14             | Lands with woody vegetation less than 2 m tall and with shrub canopy cover between 10% and 60%. The shrub foliage can be either evergreen or deciduous                                                                             |
| SAV  | 9    | Savannas                    | 8              | Lands with herbaceous and other understory systems, and with forest canopy cover between 10% and 30%. The forest cover height exceeds 2 m                                                                                          |
| WET  | 11   | Persistent Wetlands         | 21             | Lands with a permanent mixture of water and herbaceous or woody vegetation. The vegetation can be present either in salt, brackish, or fresh water.                                                                                |
| WSA  | 8    | Woody Savannas              | 6              | Lands with herbaceous and other understory systems, and with forest canopy cover between 30% and 60%. The forest cover height exceeds 2 m.                                                                                         |



Reference:

1. Belward, A.S., *The IGBP-DIS global 1 km land cover data set" DISCover": Proposal and implementation plans: Report of the Land Cover Working Group of IGBP-DIS*. 1992: IGBP-DIS Office.
2. Loveland, T., et al., *Development of a global land characteristics database and IGBP DISCover from 1 km AVHRR data*. *Int. J. Remote Sens.*, 2000. **21**: p. 1303-1330.
